# Supplementary material for: Simple methods for tuning the pore diameter of mesoporous carbon
Source: Royal Society of Chemistry journal article supplement (doi:10.1039/c1cc13471j), 2011-01-01
Supplement: c1cc13471j.pdf [file c1cc13471j.pdf]

## Supporting Information

TEM image of Mesoporous Carbon (MC), with R/F127 = 200, show hexagonally arranged open pore structure (diameter = 7 nm). Raman spectroscopy observations for both R/F127 = 200 and 50 and also R/F = 50 with different polymerization time i.e. 6 and 12 hours show nearly same G/D ratio, concluding that even if surface morphology changes with respect to the parameters, quality of the sample remains same. Details of the textural properties, calculated from nitrogen adsorption/desorption measurements, are in Table 1.

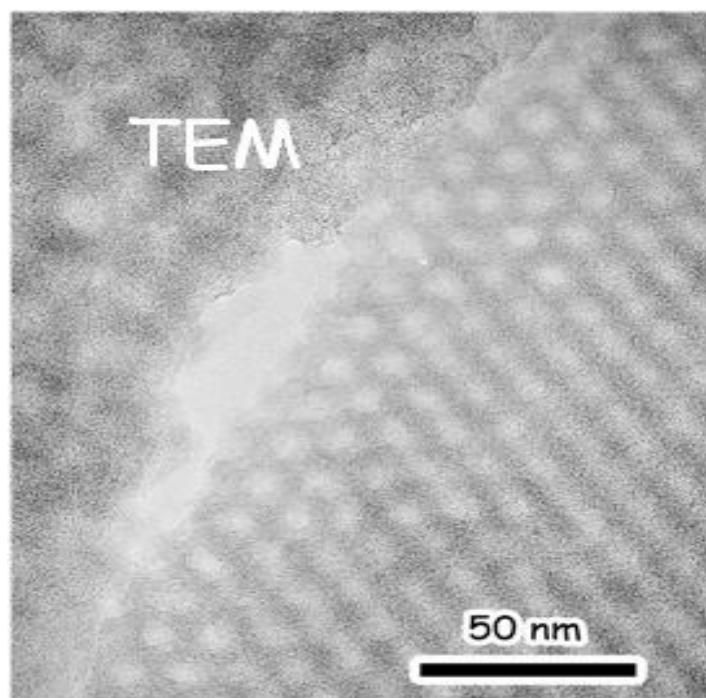

Fig S1 – TEM image of the mesoporous carbon with R/F = 200

(also see in Hayashi A., Notsu H, Kimijima K, Miyamoto J, Yagi I, *Electrochimica Acta* , **2008**, 53, 6117.)

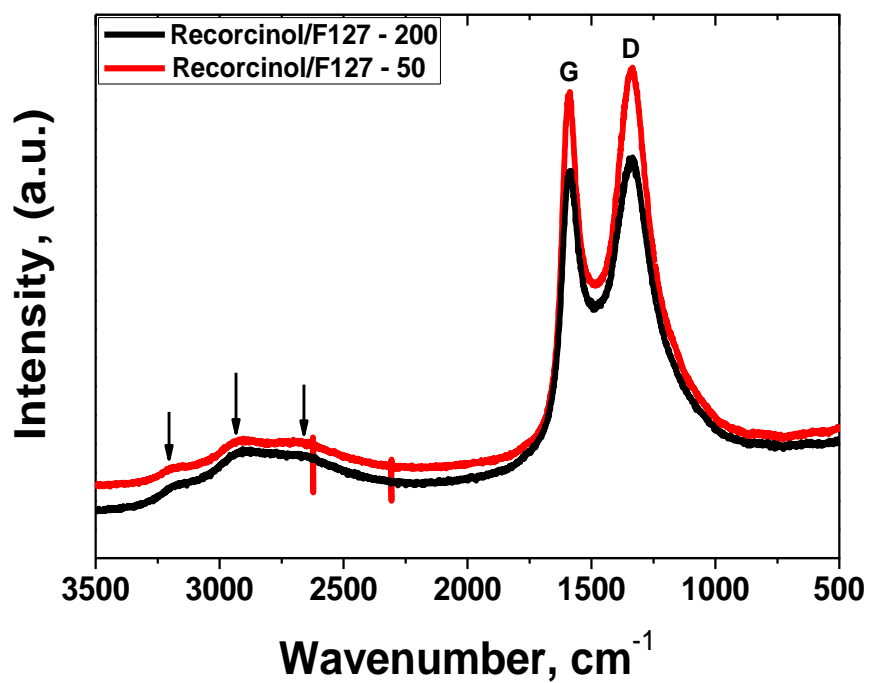

Fig S2 – Raman Spectra of the mesoporous carbon synthesized at molar ratio of R/F127 = 200 and R/F127= 50

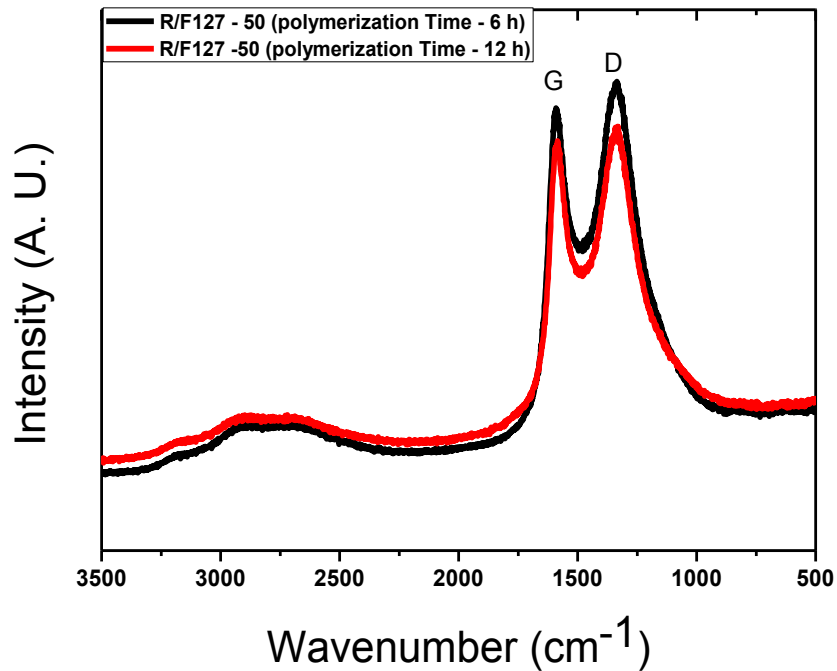

Fig S2 – Raman Spectra of the mesoporous carbon synthesized at molar ratio of R/F127 = 50 at different polymerization time 6 and 12 hours.

| <b>Sr. No</b> | <b>Sample Name</b>                                              | <b>A<sub>BET</sub> (m<sup>2</sup>/g)</b><br>[Surface Area] | <b>d<sub>p (ads)</sub> (nm)</b><br>[Pore Diameter] | <b>V<sub>p</sub> (cm<sup>3</sup>/g)</b><br>[Pore volume] |
|---------------|-----------------------------------------------------------------|------------------------------------------------------------|----------------------------------------------------|----------------------------------------------------------|
| 1.            | MC-1,<br>with R/F127 = 200                                      | 600                                                        | 7                                                  | 0.3931                                                   |
| 2.            | MC-2,<br>with R/F127 = 50 and<br>6 hour polymerization<br>time  | 454                                                        | 9                                                  | 0.5945                                                   |
| 3.            | MC-3,<br>with R/F127 = 50 and<br>12 hour polymerization<br>time | 420                                                        | 12.5                                               | 0.6549                                                   |

**Table 1** – Textural properties of Mesoporous carbon
